# Supplementary material
Source: PubMed Central journal article supplement (PMC1689500)
Supplement: 32EBMDCGF30XD17K_265_2063s1.pdf [file 32EBMDCGF30XD17K_265_2063s1.pdf]

This is an appendix to the paper by K. P. Able & J. R. Belthoff 1998 Rapid 'evolution' of migratory behaviour in the introduced house finch of eastern North America. *Proc. R. Soc. Lond. B* 265, 2063–2071.

**APPENDIX A**

Table 2. *Details of seventeen banded house finches that were encountered more than once after banding*

(Age at banding: HY, hatching-year birds banded before their first breeding season; AHY, banded during or after their first breeding season; U, unknown age.)

| banding date<br>(d/m/y) | location/<br>state    | age at<br>banding | recapture date<br>(d/m/y) | location/<br>state    | direction<br>(deg) | distance<br>(km) |
|-------------------------|-----------------------|-------------------|---------------------------|-----------------------|--------------------|------------------|
| 5/3/66                  | 39°10' N, 76°50' W MD | AHY               | 16/6/66                   | 40°30' N, 73°40' W NY | 61                 | 309              |
|                         |                       |                   | 16/12/66                  | 40°30' N, 73°40' W NY | 61                 | 309              |
| 7/1/67                  | 38°50' N, 77°00' W MD | U                 | 6/12/68                   | 40°30' N, 73°40' W NY | 57                 | 340              |
|                         |                       |                   | 31/7/69                   | 40°30' N, 73°40' W NY | 57                 | 340              |
| 5/3/67                  | 38°40' N, 76°30' W MD | AHY               | 21/11/67                  | 40°30' N, 73°40' W NY | 50                 | 317              |
|                         |                       |                   | 8/8/68                    | 40°30' N, 73°40' W NY | 50                 | 317              |
| 17/2/72                 | 39°20' N, 76°30' W MD | AHY               | 9/3/75                    | 40°30' N, 73°40' W NY | 58                 | 283              |
|                         |                       |                   | 20/12/76                  | 39°10' N, 76°30' W MD | 180                | 19               |
| 30/11/74                | 38°50' N, 77°00' W MD | U                 | 25/11/75                  | 40°00' N, 75°20' W PA | 48                 | 193              |
|                         |                       |                   | 5/5/76                    | 40°00' N, 75°20' W PA | 48                 | 120              |
|                         |                       |                   | 24/8/76                   | 40°00' N, 75°20' W PA | 48                 | 120              |
| 22/3/81                 | 38°50' N, 76°40' W MD | AHY               | 25/11/81                  | 40°20' N, 74°20' W NJ | 50                 | 261              |
|                         |                       |                   | 15/12/81                  | 40°20' N, 74°20' W NJ | 50                 | 261              |
| 26/1/64                 | 40°20' N, 74°00' W NJ | AHY               | 31/12/64                  | 40°30' N, 73°40' W NY | 56                 | 34               |
|                         |                       |                   | 24/12/65                  | 40°30' N, 73°40' W NY | 56                 | 34               |
|                         |                       |                   | 20/4/66                   | 40°30' N, 73°40' W NY | 56                 | 34               |
| 29/1/65                 | 40°50' N, 74°00' W NJ | U                 | 24/7/66                   | 40°30' N, 73°40' W NY | 66                 | 47               |
|                         |                       |                   | 18/1/68                   | 40°30' N, 73°40' W NY | 66                 | 47               |
| 4/6/65                  | 40°30' N, 73°40' W NY | AHY               | 2/1/66                    | 40°00' N, 75°00' W PA | 243                | 126              |
|                         |                       |                   | 6/11/67                   | 40°00' N, 75°00' W PA | 243                | 126              |
| 7/8/66                  | 40°30' N, 73°40' W NY | HY                | 14/2/67                   | 40°00' N, 75°00' W PA | 243                | 126              |
|                         |                       |                   | 23/12/67                  | 40°00' N, 75°00' W PA | 243                | 126              |
|                         |                       |                   | 1/2/69                    | 40°00' N, 73°00' W PA | 243                | 126              |
| 4/4/67                  | 40°30' N, 73°40' W NY | AHY               | 9/12/67                   | 40°00' N, 75°00' W PA | 243                | 126              |
|                         |                       |                   | 18/1/70                   | 40°00' N, 75°00' W PA | 243                | 126              |
| 19/12/59                | 40°00' N, 75°10' W PA | AHY               | 5/11/61                   | 41°00' N, 73°30' W CT | 51                 | 180              |
|                         |                       |                   | 4/5/62                    | 41°00' N, 73°30' W CT | 51                 | 180              |
| 21/1/61                 | 40°00' N, 75°10' W PA | AHY               | 29/1/65                   | 40°30' N, 73°40' W NY | 66                 | 138              |
|                         |                       |                   | 29/6/65                   | 40°30' N, 73°40' W NY | 66                 | 138              |
| 3/12/66                 | 40°00' N, 75°00' W PA | U                 | 23/3/67                   | 40°30' N, 73°40' W NY | 69                 | 106              |
|                         |                       |                   | 28/11/68                  | 40°30' N, 73°40' W NY | 69                 | 106              |
| 14/7/74                 | 39°50' N, 75°10' W PA | HY                | 30/1/78                   | 37°50' N, 75°20' W VA | 183                | 224              |
|                         |                       |                   | 29/1/79                   | 37°50' N, 75°20' W VA | 183                | 224              |
| 29/11/87                | 41°50' N, 87°50' W IL | U                 | 16/11/89                  | 35°00' N, 90°00' W TN | 193                | 784              |
|                         |                       |                   | 6/1/92                    | 35°00' N, 90°00' W TN | 193                | 784              |
| 25/1/70                 | 37°30' N, 77°30' W VA | AHY               | 27/12/70                  | 40°00' N, 75°10' W PA | 36                 | 344              |
|                         |                       |                   | 11/12/71                  | 40°00' N, 75°10' W PA | 36                 | 344              |
|                         |                       |                   | 20/11/72                  | 40°00' N, 75°10' W PA | 36                 | 344              |
